# Supplementary material for: VPS13C and STING expression in neuropsychiatric systemic lupus erythematosus: unveiling an unbreached territory
Source: PubMed Central journal article supplement — Lupus Sci Med. 2024 Sep 20;11(2):e001271. doi: 10.1136/lupus-2024-001271 (PMC11418578; doi:10.1136/lupus-2024-001271), 2024-09-20
Supplement: lupus-11-2-s001.pdf [file lupus-11-2-s001.pdf]

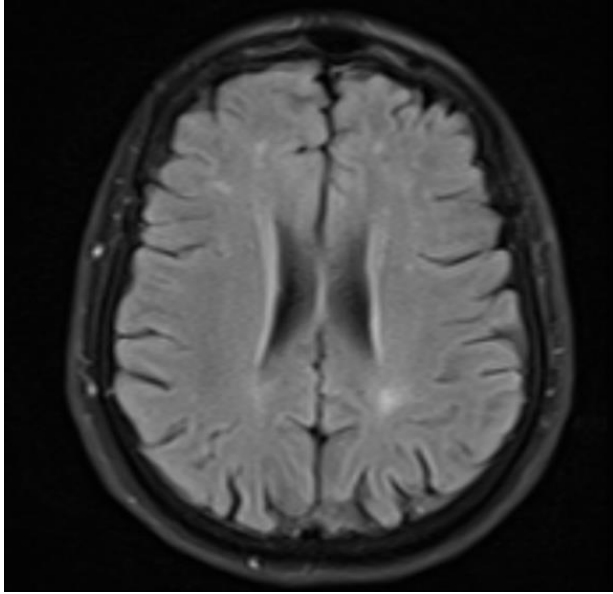

(A)

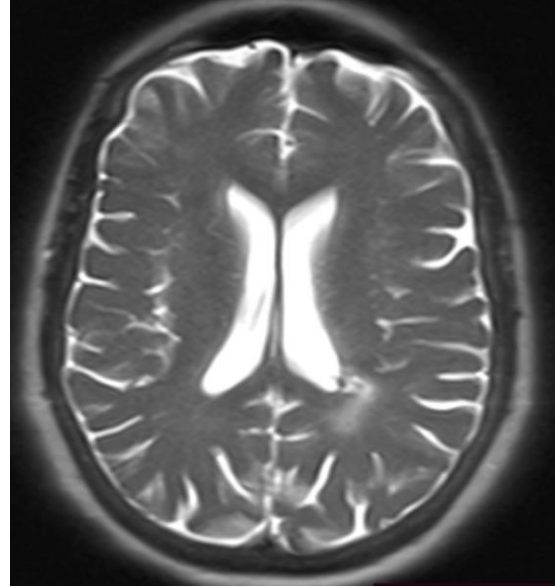

(B)

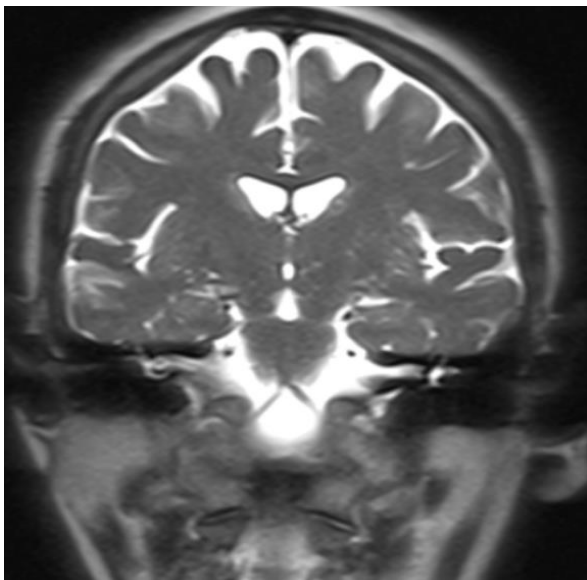

(C)

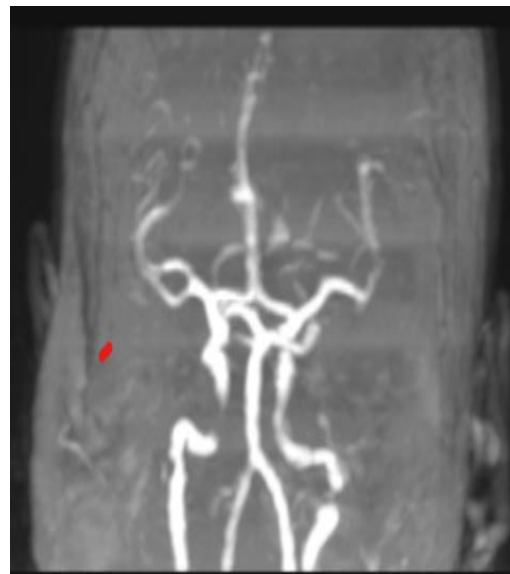

(D)

**Supplementary figure (1): Abnormal MRI signals in 21 years female patient with SLE presented with headache: (A) Axial FLAIR, (B) & (C) Axial and Coronal T2WI images** showing show -Multiple white matter hyperintensity seen at bilateral periventricular location & frontal subcortical white matter high signal intensity lesions seen on T2WI & FLAIR. -Mild atrophic changes in the form of Mild dilated ventricles with prominent cortical sulci and Sylvian fissures.

**(D) MRA (Magnetic Resonance Angiography)** shows normal flow-related enhancement of examined anterior and posterior parts of the circle of Willis with no detected thrombus or occlusion.

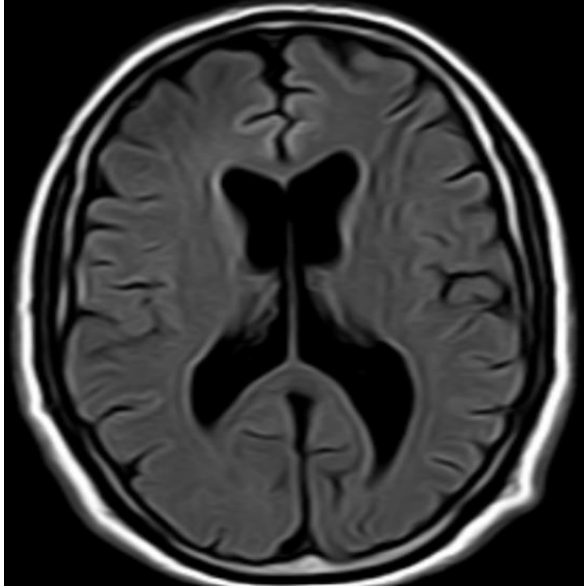

(A)

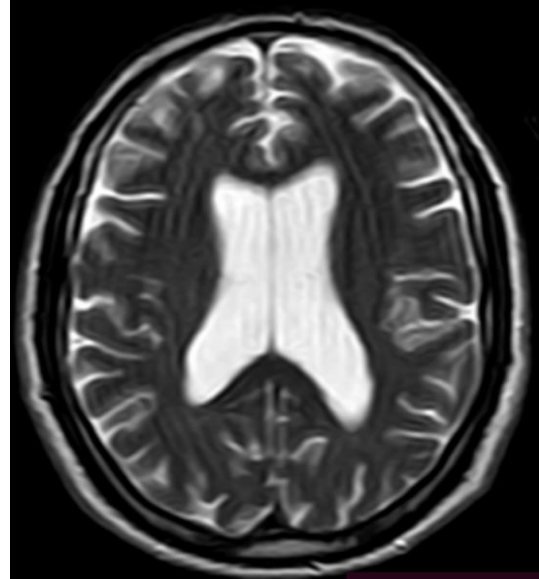

(B)

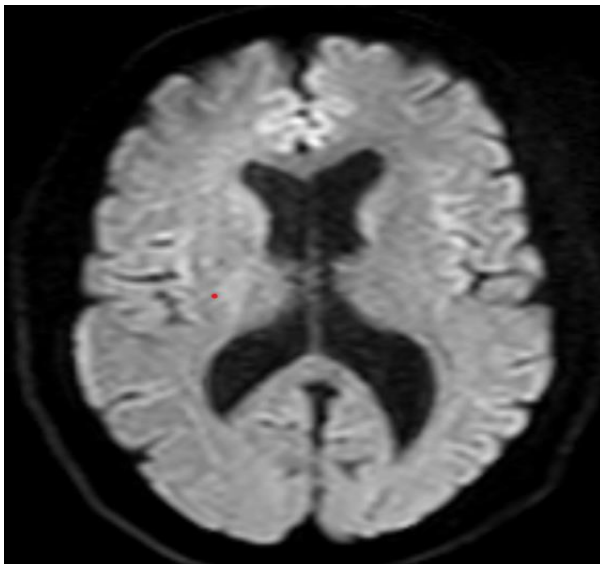

(C)

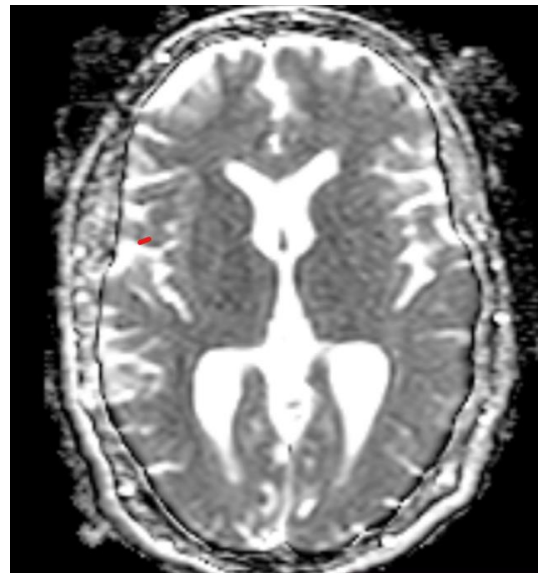

(D)

**Supplementary figure (2): 35-year-old SLE patient presented with seizures and psychosis.** (A) Axial FLAIR, (B) Axial T2WI images; show significant brain atrophic changes in the form of Moderate dilated ventricles with prominent cortical sulci and Sylvian fissures.

(C) and (D) DWI (Diffusion-weighted imaging) and ADC (Apparent diffusion coefficient) maps show no areas of diffusion restriction denoting no evidence of acute ischemic insult.

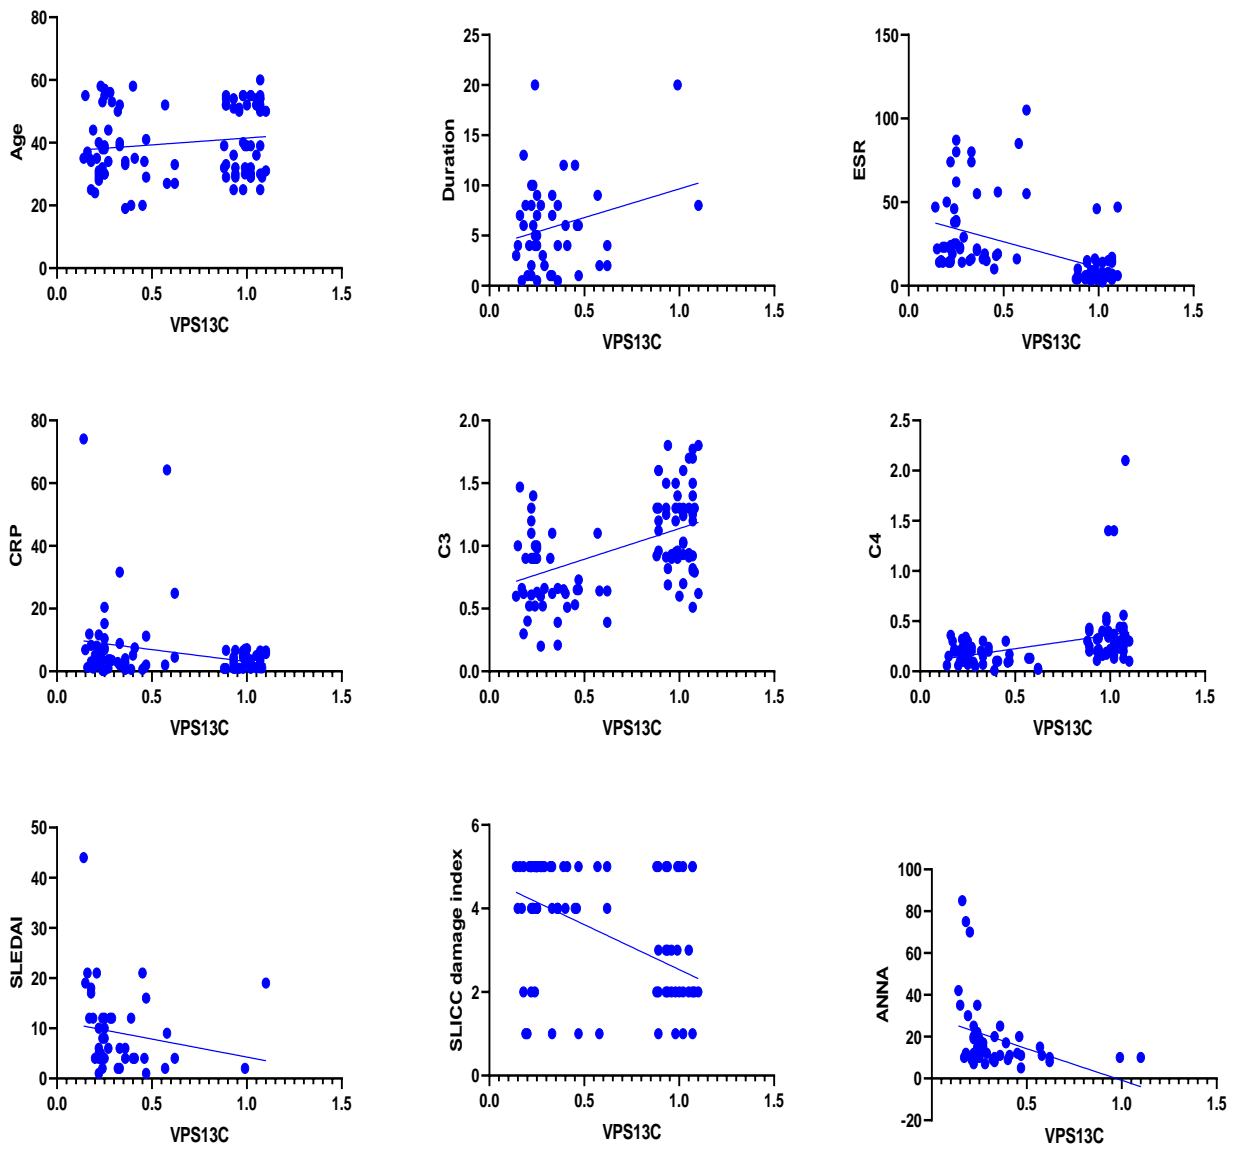

**Supplementary figure (3): Correlation of VPS13C expression levels with patients' characteristics**

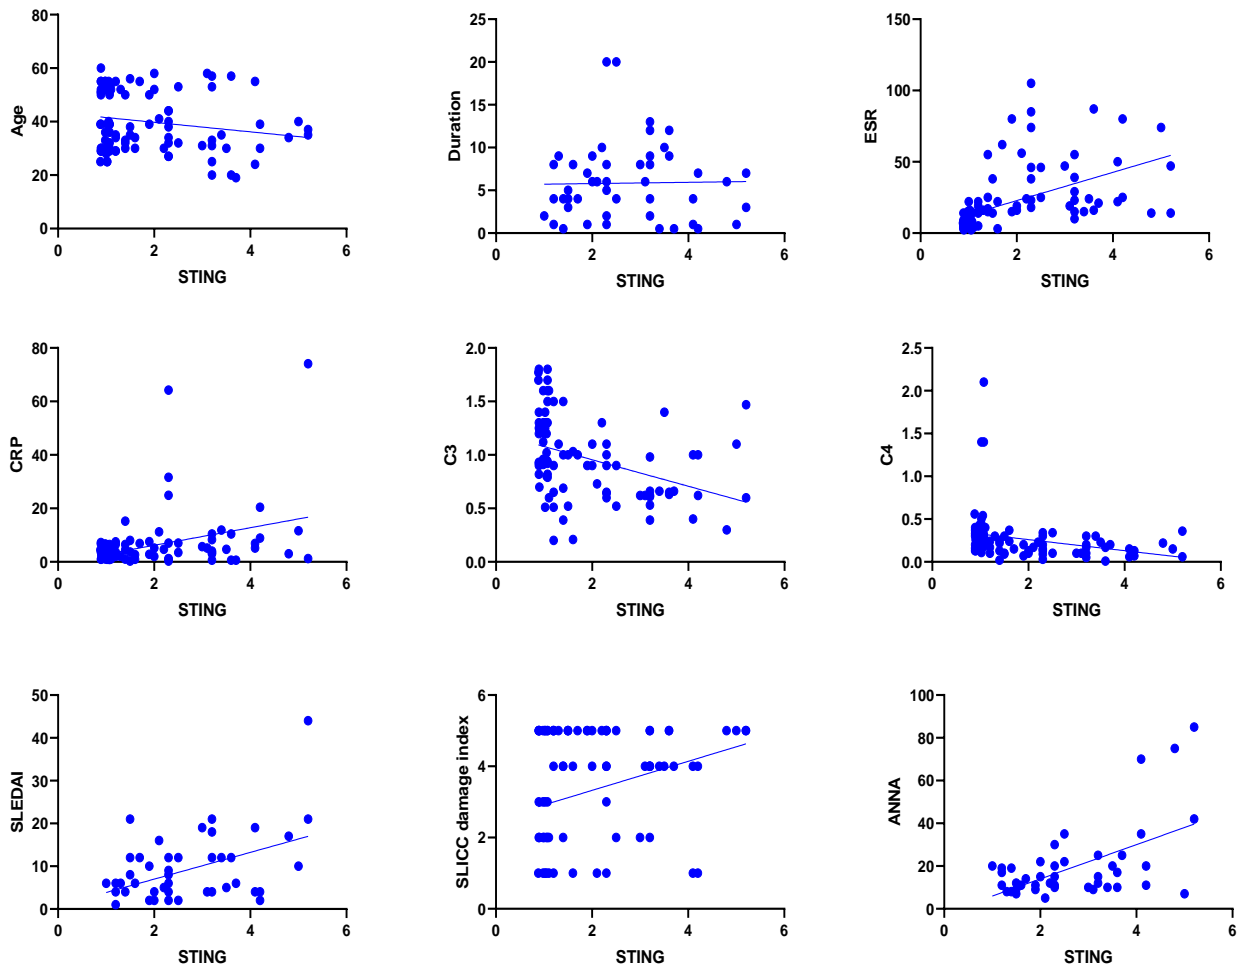

**Supplementary figure (4): Correlation of STING expression levels with patients' characteristics**
